# Supplementary material
Source: MDPI journal article supplement (https://www.mdpi.com/2414-4088/3/3/57)
Supplement: s1 [file s1]

Author,Title,PublishedIn,Year
"Almeida, A. P.; Girao, L. M.; Gehlhaar, R.; Rodrigues, P. M.; Rodrigues, H.; Neto, P.; Monica, M.",Sound= space opera: choreographing life within an interactive musical environment,International Journal on Disability Human Development,2011
"Anderson, T.",Using music performance software with flexible control interfaces for live performance by severely disabled musicians,EUROMICRO Conference,1999
"Anderson, T.; Smith, C.",Composability: widening participation in music making for people with disabilities via music software and controller solutions,ACM Conference on Assistive Technologies,1996
"Andersson, A.P.; Cappelen, B.",Designing empowering vocal and tangible interaction,International Conference on New Interfaces for Musical Expression,2013
"Andersson, A.P.; Cappelen, B.",Musical interaction for health improvement,Oxford handbook of interactive audio,2014
"Andersson, A.P.; Cappelen, B.",Vocal and tangible interaction in RHYME,"Music, Health, Technology and Design",2014
"Azeredo, M.",Real-time composition of image and sound in the (re)habilitation of children with special needs: a case study of a child with cerebral palsy,Digital Creativity,2007
"Aziz, A.D.; Warren, C.; Bursk, H.; Follmer, S.",The flote: an instrument for people with limited mobility,ACM SIGACCESS Conference on Computers and Accessibility,2008
"Benveniste, S.; Jouvelot, P.; Lecourt, E.; Michel, R.",Designing wiimprovisation for mediation in group music therapy with children suffering from behavioral disorders,International Conference on Interaction Design and Children,2009
"Benveniste, S.; Jouvelot, P.; Michel, R.",Wii game technology for music therapy: A first experiment with children suffering from behavioral disorders,"Multi Conference on Computer Science and Information Systems, MCCIS'08 (Gaming)",2008
"Bergsland, A.; Wechsler, R.","Composing interactive dance pieces for the motioncomposer, a device for persons with disabilities",International Conference on New Interfaces for Musical Expression,2015
"Bhat, S.",TouchTone: an electronic musical instrument for children with hemiplegic cerebral palsy,"International Conference on Tangible, Embedded, and Embodied Interaction",2010
"Blatherwick, A.",MAMI: A modular accessible musical instrument,Conference of British HCI,2016
"Boulanger, A.","Music, mind and health: how community change, diagnosis, and neuro-rehabilitation can be targeted during creative tasks","Doctoral dissertation, Massachusetts Institute of Technology",2010
"Bresin, R.; Elblaus, L.; Frid, E.; Favero, F.; Annersten, L.; Berner, D.; Morreale, F.",Sound forest/Ljudskogen: A large-scale string-based interactive musical instrument,Sound and Music Computing Conference,2016
"Camurri, A.; Volpe, G.; Canazza, S.; Canepa, C.; Roda, A.; Zanolla, S.; Foresti, G.L.",The ‘Stanza LogoMotoria': an interactive environment for learning and communication,Sound and Music Computing Conference,2010
"Cappelen, B.; Andersson, A.P.",Health improving multi-sensorial and musical environments,Audio Mostly,2016
"Cappelen, B.; Andersson, A.P.",Embodied and distributed parallel djing,"Universal Design 2016: Learning from the Past, Designing for the Future",2016
"Cappelen, B.; Andersson, A.P.",Expanding the role of the instrument,International Conference on New Interfaces for Musical Expression,2011
"Cappelen, B.; Andersson, A.P.",Design for co-creation with interactive montage,Nordes,2011
"Cappelen, B.; Andersson, A.P.",Designing smart textiles for music and health,Ambience 2011,2011
"Cappelen, B.; Andersson, A.P.",The empowering potential of re-staging,Leonardo Electronic Almanac,2012
"Cappelen, B.; Andersson, A.P.",Musicking tangibles for empowerment,International Conference on Computers for Handicapped Persons,2012
"Cappelen, B.; Andersson, A.P.",Towards an empowering tangible interaction design for diversity,Include ,2013
"Cappelen, B.; Andersson, A.P.",Designing four generations of 'Musicking Tangibles',"Music, Health, Technology and Design ",2014
"Challis, B.P.",Octonic: An accessible electronic musical instrument,Digital Creativity,2011
"Challis, B.P.",An infrared sound and music controller for users with specific needs,International Journal on Disability and Human Development,2011
"Challis, B.P.; Smith, R.",Inclusive technology and community music,Accessible Design in the Digital World,2008
"Correa, A.G.D.; Ficheman, I.K.; do Nascimento, M.; de Deus Lopes, R.",Computer Assisted Music Therapy : A Case Study of an Augmented Reality Musical System for Children with Cerebral Palsy Rehabilitation,IEEE International Conference on Advanced Learning Technologies,2009
"Dickens, A.; Greenhalgh, C.; Koleva, B.",Creating space for facilitated music performance gesture controlled sound for users with complex disabilities,Audio Mostly,2017
"Dickens, A.; Greenhalgh, C.; Koleva, B.",Facilitating accessibility in performance: Participatory design for digital musical instruments,AES: Journal of the Audio Engineering Society,2018
"Dvorak, A.L.; Boresow, E.",Using the Adaptive Use Musical Instrument (AUMI) in Music Therapy Clinical Practice,Music Therapy Perspectives,2018
"Eaton, J.; Williams, D.; Miranda, E.",The Space Between Us: Evaluating a multi-user affective brain-computer music interface,Brain-Computer Interfaces,2015
"Eide, I.","Field and Agent: Health and characteristic dualities in the co-creative, interactive and musical tangibles in the RHYME project","Music, Health, Technology and Design",2014
"Ellis, P.",Incidental music: A case study in the development of sound therapy,"British Journal of Music Education,",1995
"Ellis, P.",The music of sound: a new approach for children with severe and profound and multiple learning difficulties,"British Journal of Music Education,",1997
"Ellis, P.",Vibroacoustic sound therapy: case studies with children with profound and multiple learning difficulties and the elderly in long-term residential care,Studies in Health Technology Informatics,2004
"Favilla, S.; Pedell, S.",Touch screen collaborative music: Designing nime for older people with dementia,International Conference on New Interfaces for Musical Expression,2014
"Gehlhaar, R.",Sound= Space: an interactive musical environment,Contemporary Music Review,1991
"Gehlhaar, R.; Rodrigues, P. M.; Girao, L. M.; Penha, R.",Instruments for everyone: Designing new means of musical expression for disabled creators,Studies in Computational Intelligence,2014
"Gorman, M.; Lahav, A.; Saltzman, E.; Betke, M.",A camera-based music-making tool for physical rehabilitation,Computer Music Journal,2007
"Graham-Knight, K.; Tzanetakis, G.",Adaptive music technology using the kinect,ACM International Conference on Pervasive Technologies Related to Assistive Environments,2015
"Grierson, M.",Composing with Brainwaves: Minimal Trial P300 Recognition as an Indication of subjective Preference for the control of a Musical Instrument,International Computer Music Conference,2008
"Grierson, M.; Kiefer, C.",NoiseBear: A Malleable Wireless Controller Designed In Participation with Disabled Children,International Conference on New Interfaces for Musical Expression,2013
"Grierson, M.S.",Making music with images: interactive audiovisual performance systems for the deaf,EVA 2008 London Conference,2008
"Gumtau, S.; Newland, P.; Creed, C.",MEDIATE‚ a responsive environment designed for children with autism,In Accessible Design in a Digital World,2005
"Hansen, K.F.; Dravins, C.; Bresin, R.","Ljudskrapan/The Soundscraper: Sound exploration for children with complex needs, accommodating hearing aids and cochlear implants",Sound and Music Computing Conference,2011
"Hansen, K.  F.; Dravins, C.; Bresin, R.",Active Listening and Expressive Communication for Children with Hearing Loss Using Getatable Environments for Creativity,Journal of New Music Research,2012
"Hantrakul, L.; Kaczmarek, K.","Implementations of the Leap Motion in sound synthesis, effects modulation and assistive performance tools",Joint Sound and Music Computing Conference and International Computer Music Conference ,2014
"Harrison, J.; McPherson, A.",An adapted bass guitar for one-handed playing,International Conference on New Interfaces for Musical Expression,2017
"Harrison, J.; McPherson, A. ",Adapting the Bass Guitar for One-Handed Playing,Journal of New Music Research,2017
"Hayes, L.",Enacting Musical Worlds: Common Approaches to using NIMEs within Performance and Person-Centred Arts Practices,International Conference on New Interfaces for Musical Expression,2015
"Holone, H.; Herstad, J.",RHYME: Musicking for All,Computers Helping People with Special Needs,2012
"Holone, H.; Herstad, J.",RHYME: Musicking for all,Journal of Assistive Technologies,2013
"Hunt, A.; Kirk, R.","MidiGrid: past, present and future",International Conference on New Interfaces for Musical Expression,2003
"Hunt, A.; Kirk, R.; Abbotson, M.; Abbotson, R.",Music Therapy and Electronic Technology,EuroMicro Conference,2000
"Hunt, A.; Kirk, R.; Neighbour, M. ",Multiple media interfaces for music therapy,IEEE Multimedia,2004
"Hunt, A.; Kirk, R.; Orton, R.",MIDIGRID: An Innovative Computer-based Performance and Composition System,International Computer Music Conference,1990
"Jense, A.; Leeuw, H.",Wambam: a case study in design for an electronic musical instrument for severely intellectually disabled users,International Conference on New Interfaces for Musical Expression,2015
"Jensenius, A.R.; Voldsund, A.","The music ball project: Concept, design, development, performance",International Conference on New Interfaces for Musical Expression,2012
"Jo, J.  H.; Yeo, J.  J.; Yang, Y.; Ieee",Development of digital ukulele and mobile rehabilitation contents for enhanced therapeutic instrumental music performance (TIMP),IEEE International Conference on Consumer Electronics-Asia,2016
"Kirk, R.; Abbotson, M.; Abbotson, R.; Hunt, A.; Cleaton, A.",Computer music in the service of music therapy: the MIDIGRID and MIDICREATOR systems,Medical Engineering Physics,1994
"Kirwan, N.J.; Overholt, D.; Erkut, C.",Bean: A Digital Musical Instrument for Use in Music Therapy,Sound and Music Computing Conference,2015
"Knapp, R. B.; Lusted, H.S.",A Bioelectric Controller for Computer Music Applications,Computer Music Journal,1990
"Kontogeorgakopoulos, A.; Wechsler, R.; Keay-Bright, W.",Camera-Based Motion Tracking and Performing Arts for Persons with Motor Disabilities and Autism,Disability Informatics and Web Accessibility for Motor Limitations,2013
"Lamont, A.; Knox, R.; Chau, T.; Hamdani, Y.; Schwellnus, H.; Tam, C.; Johnson, P.",Converting movements to music new musical exploration opportunities for children in rehabilitation,"Canadian Asso. for Music Therapy 29th Annual Conference, Regina, Canada",2002
"Larsen, J.V.; Overholt, D.; Moeslund, T.B.",The Actuated guitar: Implementation and user test on children with Hemiplegia,International Conference on New Interfaces for Musical Expression,2014
"Larsen, J.V.; Knoche, H.; Overholt, D.",A Longitudinal Field Trial with a Hemiplegic Guitarist Using The Actuated Guitar,International Conference on New Interfaces for Musical Expression ,2018
"Larsen, J.V.; Moeslund, T.B.; Overholt, D.",Exercising the Tibialis Anterior Muscle of Children with Cerebral Palsy for Improved Neuroplasticity using an Electrical Guitar,"Replace, Repair, Restore, Relieve ‚Äì Bridging Clinical and Engineering Solutions in Neurorehabilitation",2014
"Larsen, J.V.; Overholt, Dan; Moeslund, Thomas B.",The Actuated Guitar: A platform enabling alternative interaction methods,Sound and Music Computing Conference,2013
"Levican, C.; Belaunde, V.; Vega, A.; Aparicio, A.; F. Cadiz, R.",Enobio2OSC: brain-computer interface for musical creation,International Computer Music Conference,2018
"Luhtala, M.; Kymaainen, T.; Plomp, J.",Designing a Music Performance Space for Persons with Intellectual Learning Disabilities,International Conference on New Interfaces for Musical Expression,2011
"Mann, S.; Fung, J.; Garten, A.","Deconcert: bathing in the light, sound, and Waters of the Musical Brainbaths",International Computer Music Conference,2007
"Matossian, V.; Gehlhaar, R.",Human instruments: Accessible musical instruments for people with varied physical ability,Annual review of Cybertherapy Telemedicine,2015
"McCloskey, B.; Bridges, B.; Lyons, F.",Accessibility and dimensionalty: enhanced real-time creative independence for digital musicians with quadriplegic cerebral palsy,International Conference on New Interfaces for Musical Expression,2015
"McCloskey, J.B.","inGrid: A new tactile, tangible and accessible digital musical instrument for enhanced creative independence amongst musicians with quadriplegic cerebral palsy","Doctoral dissertation, Ulster University",2014
"Meckin, D.; Bryan-Kinns, N.","MoosikMasheens: Music, motion and narrative with young people who have complex needs",ACM Interaction Design and Children (IDC) Conference,2013
"Miranda, D.",Plymouth brain-computer music interfacing project: from EEG audio mixers to composition informed by cognitive neuroscience,International Journal of Arts and Technology,2010
"Miranda, E.D.; Boskamp, B.",Steering generative rules with the EEG: An approach to brain-computer music interfacing,Sound and Music Computing Conference,2005
"Miranda, E. R.; Brouse, A.; Boskamp, B.; Mullaney, H.",Plymouth brain-Computer Music Interface Project: Intelligent assistive Technology for Music-Making,International Computer Music Conference,2005
"Miranda, E.R.; Magee, W.L.; Wilson, J.J.; Eaton, J.; Palaniappan, R.",Brain-computer music interfacing (BCMI): from basic research to the real world of special needs,Music and Medicine,2011
"Nath, A.; Young, Samson",Vesball: a ball-shaped instrument for music therapy,International Conference on New Interfaces for Musical Expression,2015
"Newland, P.; Creed, C.; Geesin, M.R.",MEDIATE: Steps Towards a Self-organising Interface,Engineering nature: art consciousness in the post-biological era,2003
"Ng, W.F.; Zhou, Y.; Tan, P.; Wang, Y.",Using the MOGCLASS in Group Music Therapy With Individuals With Muscular Dystrophy: A Pilot Study,Music and Medicine,2012
"Overholt, D.; Berdahl, E.; Hamilton, R.",Advancements in Actuated Musical Instruments,Organised Sound,2011
"Partesotti, E.; Manzolli, J.; Penalba, A.",Interactive musical technology enhances creativity: A case study with e-mocomu technology,"INTED, International Technology, Education and Development Conference",2017
"Pinegger, A.; Hiebel, H.; Wriessnegger, S.  C.; Muller-Putz, G.R.",Composing only by thought: Novel application of the P300 brain-computer interface,PLoS ONE,2017
"Reilly, J. F.",LIGHTNING strikes: A correlational study of the gesturo-musical responses of in-patients with acute manic or depressive symptomatology using the LIGHTNING module,Journal of Music Therapy,1997
"Reis, L.S.; Reis, G.; Barroso, J.; Pereira, A.",AMIGA - An Interactive Musical Environment for Gerontechnology,International Conference on Software Development for Enhancing Accessibility and Fight Info-Exclusion,2012
"Rigler, J.; Seldess, Z.",The Music Cre8tor: an interactive system for musical exploration and education,International Conference on New Interfaces for Musical Expression,2007
"Riley, P.; Alm, N.; Newell, A.",An interactive tool to promote musical creativity in people with dementia,Computers in Human Behavior,2009
"Ruud, E.",Health affordances of the RHYME artefacts,"Music, Health, Technology and Design",2014
"Samuels, K.","The Meanings in Making: Openness, Technology and Inclusive Music Practices for People with Disabilities",Leonardo Music Journal,2015
"Stensaeth, K.",Musical co-creation? Exploring health-promoting potentials on the use of musical and interactive tangibles for families with children with disabilities,International journal of qualitative studies on health well-being,2013
"Stensaeth, K.","Come sing, dance and relax with me!' Exploring interactive 'health musicking' between a girl with disabilities and her family playing with 'REFLECT'","Music, Health, Technology and Design",2014
"Stensaeth, K.","Potentials and challenges in interactive and musical collaborations involving children with disparate disabilities. A comparison study of how Petronella, with Down syndrome, and Dylan, with autism, interact with the musical and interactive tangible ‚ÄòWAVE'","Music, Health, Technology and Design",2014
"Stensaeth, K.; Ruud, E.",An interactive technology for health: New possibilities for the field of music and health and for music therapy? A case study of two children with disabilities playing with ‚ÄòORFI',"Music, Health, Technology and Design",2014
"Swingler, T."," That Was Me!"": Applications of the Soundbeam MIDI Controller as a Key to Creative Communication",CSUN Conference Technology and Persons with Disabilities,1998
"Swingler, T.","The invisible keyboard in the air: An overview of the educational, therapeutic and creative applications of the EMS Soundbeam","Conference for Disability, Virtual Reality and Associated Technology",1998
"Soderberg, E.A.; Odgaard, R.E.; Bitsch, S.; Hoeg-Jensen, O.; Schildt, N.; Christensen, Soren D.P.; Gelineck, S.",Music Aid-Towards a Collaborative Experience for Deaf and Hearing People in Creating Music,International Conference on New Interfaces for Musical Expression,2016
"Tam, C.; Schwellnus, H.; Eaton, C.; Hamdani, Y.; Lamont, A.; Chau, T.",Movement-to-music computer technology: a developmental play experience for children with severe physical disabilities,Occupational Therapy Interational,2007
"Timmermans, H.; van Wolferen, G.; Newland, P.; Kunath, S.",MEDIATE: Key Sonic Developments in an Interactive Installation for Children with Autism,International Computer Music Conference,2004
"Vamvakousis, Z.; Ramirez, R.",The EyeHarp: A gaze-controlled digital musical instrument,Frontiers in Psychology,2016
"Ward, A.; Woodbury, L.; Davis, T.",Design Considerations for Instruments for Users with Complex Needs in SEN Settings,International Conference on New Interfaces for Musical Expression,2017
"Wechsler, R.",Applications of Motion Tracking for Persons with Disabilities,Mensch & Computer 2012–Workshopband: interaktiv informiert–allgegenwärtig und allumfassend!?,2012
"Wilde, D.",Extending body and imagination: moving to move,International Journal on Disability Human Development,2011
"Williams, C.",Unintentional intrusive participation in multimedia interactive environments,International Journal on Disability Human Development,2011
"Yinsheng, Z.",Collaborative Mobile-Learning Systems for Music Education and Training,"Doctoral dissertation, National University of Singapore",2013
"Zubrycka, J.; Cyrta, P.",Morimo. Tactile Sound Aesthetic Experience,International Computer Music Conference ,2012
"Davanzo, N.; Dondi, P.; Mosconi, M;, Porta, M. ", Playing music with the eyes through an isomorphic interface. ,ACM Workshop on Communication by Gaze Interaction ,2018
"Hatakeyama, K.; Saraiji, M.H.D.Y. ; Minamizawa, K.",Musiarm extending prosthesis to musical expression,ACM Augmented Human International Conference,2018
"Kirk,R. ; Hunt, A. ; Hildred, M.; Verity, A.",The Role of Gesture in Environmental Control,EuroMicro Conference,2000
"Bergsland, A.;  Wechsler, R.","Movement-Music Relationships and Sound Design in MotionComposer, an Interactive Environment for Persons with (and without) Disabilities",Re-New,2013
